# Supplementary material for: The RRM of the kRNA-editing protein TbRGG2 uses multiple surfaces to bind and remodel RNA
Source: PubMed Central journal article supplement (PMC6393287; doi:10.1093/nar/gky1259), 2018-12-14
Supplement: gky1259_supplemental_files.pdf [file gky1259_supplemental_files.pdf]

Figure S1

UGAUACAAAAACAUGACUACAUGAUAAGUA CAUUUU AU GUU AUUUUU  
GGUAGUUUUUUACAUUUGUAUCGUUUUACAUUUG-GUCCACAGCAUCCCG-  
--CAGCACAU G- -GUUUUUUAUGUUUUUAUUUAUUUUUGGU GA-AUUUAU  
UUUUUA- -UAUUGAUUGUAUUUA- -GGUUUUUUGCAUCGUGGUACAGA  
AAAGUUAUGUGAAUAUAAAAGUGUAGAACA AUGUCUCCGUAUUUC  
GACAGGUUAGAUUU AUGUA-GUUGUUUGUUAAUGAGCAUUUGUUGU CUUU  
A- -UGUUUU GAGUAUUUGUUCCGAUGUUUUUGU CGUUACGUUGUCAUUUA  
UUAAUU GU A- - -GAAUUUAC- -CCGUAGUUUUAAUGGUUU GUUGUAUUUC  
AU GU AU GGUUUU GG-AUUUAGGUUGUUUGU CUCCGUUG-UUAUGAU CAUUUG  
AGGAA- -CG-UGACAAAUU GAUGACAUUUUUU GAUUUAUG- -UUGUGGUUG  
UCGU AUGCAUUU GGCUUUC AUGGUUUUUAUA-GGUUUUCUUGAUGA UUUUG  
UUUUUGGUUUU GUUGAUUUUUUGUUUGUUUGA- -UAAUAUCAUGUUUGUUUGU  
UAUGGAUUUGUAUGAUUU GUUUUUUGUUUUUGUUUUUGUUUUUGUUUUUGUUUU  
UGC- -GUUUUUUGU CAUUUUUU GAUUUAUAUGA UUA- -GUUUUA- -A- -UAG  
UUUAAGUGGUUGUUUUUGU CU CGUUUGUAGGUAUGGUUGGAGAUUGUCGUUU  
AUUUAGUU GU A- - -UGA- - -GUUGUAUUUU AU GUUUUGUAUGAUUUUGUU  
UUUGUUUU AU AGGU GAUGCAUUUGA-UCGUUUUUUUUUACGUUU GUUU GAUAU  
GCGUAUGAGUUUGUU GAUUUGUAAGCAAUGUUUUUUUGUUUGGUUUUUUU GUUU  
UUUG- - -GUUUUGUUUGUUUGUUUG- -AUUAUUUAUUUGUGAUUUUACCAUUUG-  
--AGACCAUUUAUUUGUUUUUUUAAGUUUGUGGUUGUUUGUUUUGCCGGGU  
AUUAUCAUUUGC-UUGUGUU GAACACCCCAAAGGU GA- -GUUUUGUUUGU  
UAUUUA- - -UGUUUUUGU GUUGGUUUUAUGUUUCUGUUUUACGUUUUGCGUUUGU  
GGAUUUUUUGCA-UAUUUGUUUAUUUGGAUGUUUGUUUGCGUUGGUUUUUUAUUG  
CAUGAUUUAGUUUGC- -C-GUUUUAGGUAAUAUU GAUGUUUUUUUGGAUCCG  
UAGAUCGUUA-GUUUUUAUGUG- -A- - - -GGUUAUUGUAGGAUUGUUU  
AAAAUUGAAUAAAAA-poly(A)

**Figure S1.** Sequence of the mature pan-edited ND7 mRNA from *T. brucei*. The red uridines are added by the editing process while the blue dashes represent positions where uridines are deleted. This figure was modified from the ND7 figure from [http://dna.kdna.ucla.edu/parasite\\_course-old/RNA\\_editing/subchapters/discovery\\_of\\_editing.html](http://dna.kdna.ucla.edu/parasite_course-old/RNA_editing/subchapters/discovery_of_editing.html).

Figure S2

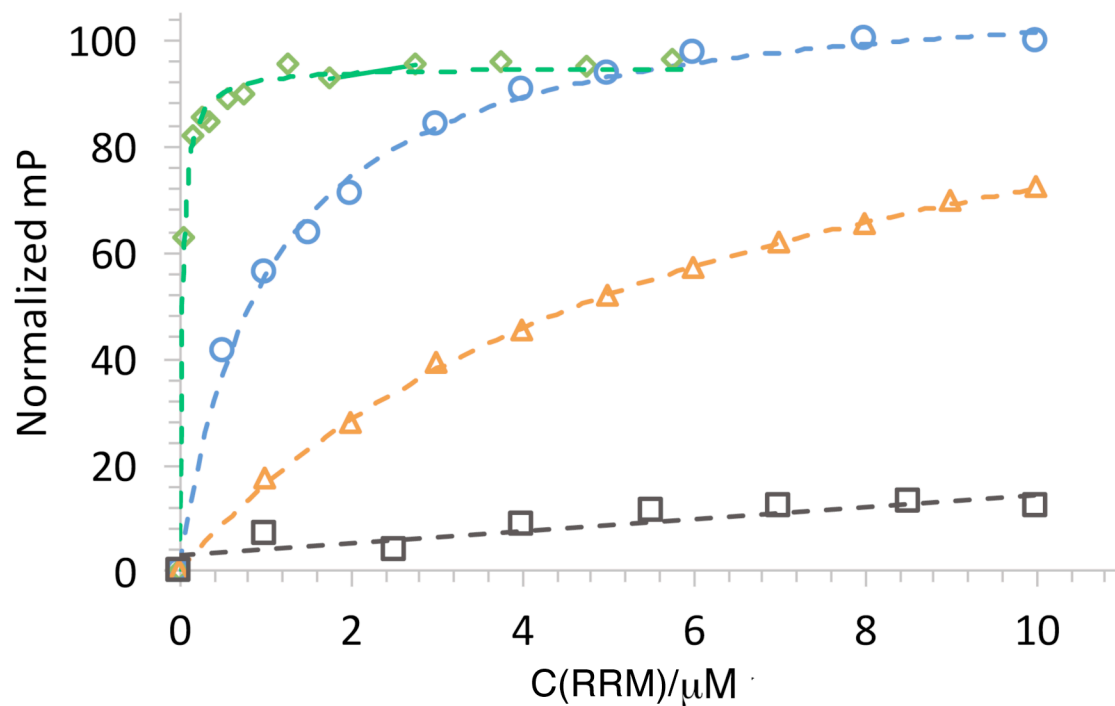

**Figure S2.** Fluorescence polarization (FP) binding studies analyzing TbRGG2 RRM RNA binding preference. Shown are FP binding isotherms of the TbRGG2 RRM binding to 20-mer RNA fragments consisting of either U20 (blue circle), A20 (orange triangle), C20 (black square) or G20 (green diamond). The x-axis is the RRM concentration in  $\mu$ M and the y-axis is the normalized mP.

Figure S3

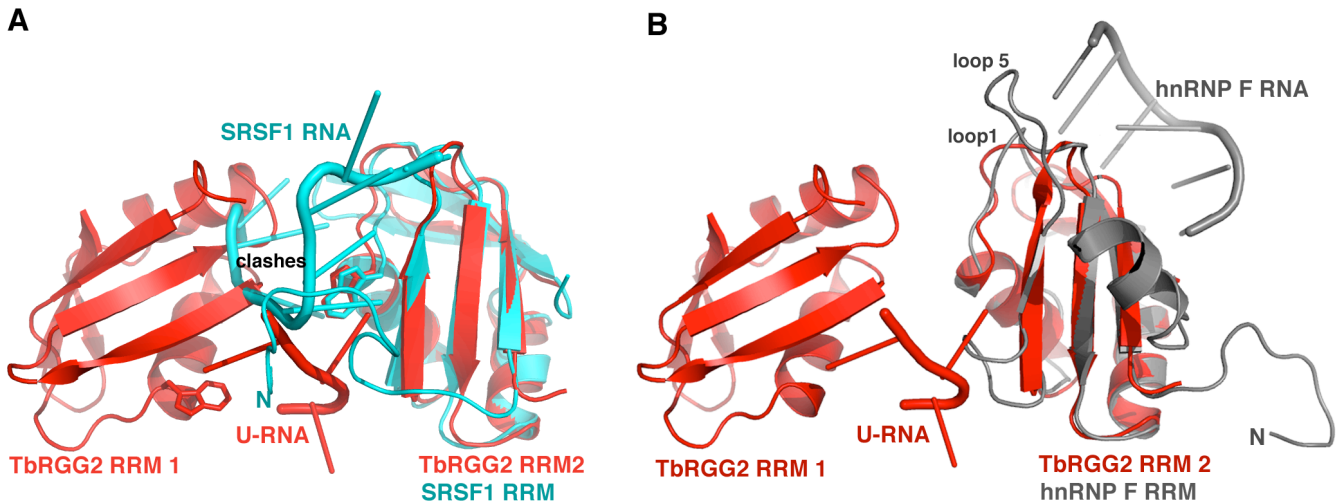

**Figure S3.** The TbRGG2 RRM-poly-U binding mode is distinct from pseudoRRM-RNA and qRRM-RNA binding modes. **(A)** Superimposition of one subunit of the TbRGG2-poly-U dimer (red) onto the RRM of the SRSF1-RNA (cyan) structure. The resulting rmsd for 66 C $\alpha$  atoms is 1.1 Å. Shown as sticks are the tryptophan residues located at the N-terminus of helix 1 that are shared on both structures and used to stack with RNA bases. Note, however that the stacking interactions made by these tryptophans are different in TbRGG2 compared to SRSF1. In addition, the N-terminal region of SRSF1 clashes with the RNA bound by the TbRGG2 dimer and the position of the bound RNA in the SRSF1-RNA structure also clashes with the other RRM subunit of the TbRGG2 dimer. **(B)** Superimposition of one subunit of the TbRGG2-poly-U dimer (red) onto the RRM of the hnRNP F-RNA (grey) structure. The resulting rmsd for 63 corresponding C $\alpha$  atoms is 1.5 Å. hnRNP F binds its target RNA using residues primarily from loops 1 and 5, which have different conformations and lengths compared to the corresponding loops in the TbRGG2 RRM. The RNA bound by hnRNP F is also docked on the opposite side of the RRM domain as is the RNA substrate in the TbRGG2-RNA structure.

Figure S4

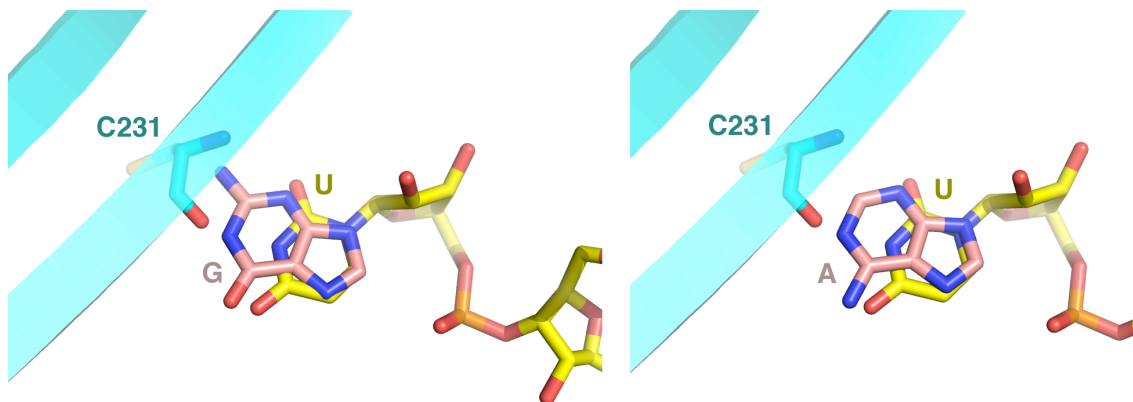

**Guanine and adenines in place of uridine/ unfavorable H-bonds and clash**

**Figure S4.** The TbRGG2 recognizes poly-U RNA via specific hydrogen bonds to backbone atoms. The TbRGG2-poly-U structure reveals specific hydrogen bonds between the uracil N3 and O2 atoms and the backbone carbonyl and amide nitrogen moieties of Cys231 on both RRM dimers. Modeling shows that adenine and guanine bases would not only be unable to make the same specific hydrogen bonds but would also clash with the RRM.

Figure S5

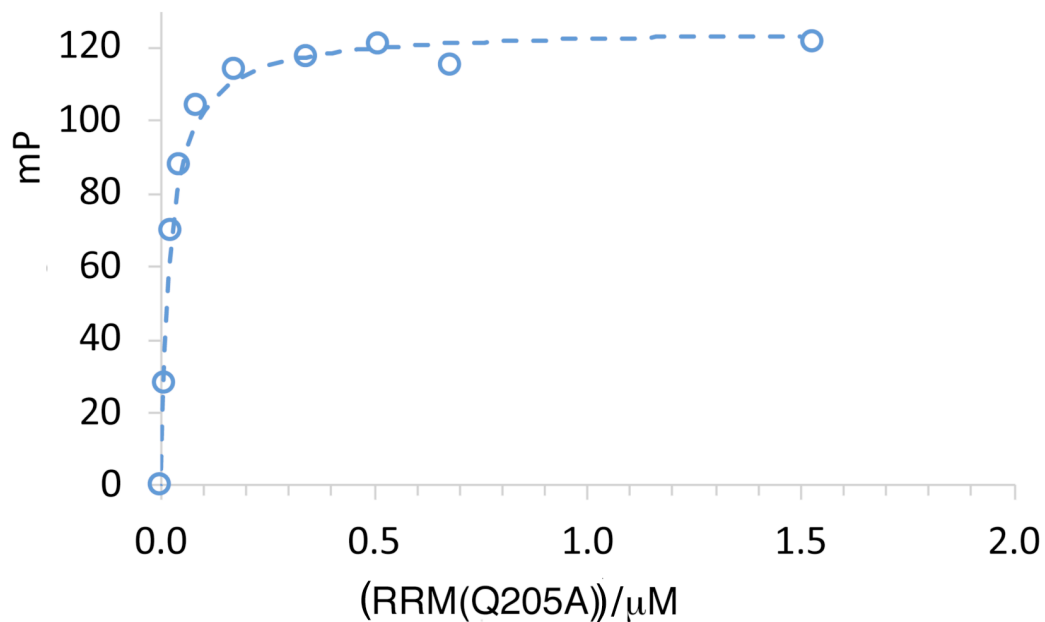

**Figure S5.** FP binding isotherm examining G20 binding by the TbRGG2 RRM(Q205A) mutant. The resultant  $K_d$  was  $21 \pm 4$  nM, which is essentially the same as the value obtained by the binding isotherm of the WT RRM binding to G20. The x-axis is the RRM(Q205A) concentration in  $\mu\text{M}$  and the y-axis is in mP units.

Figure S6

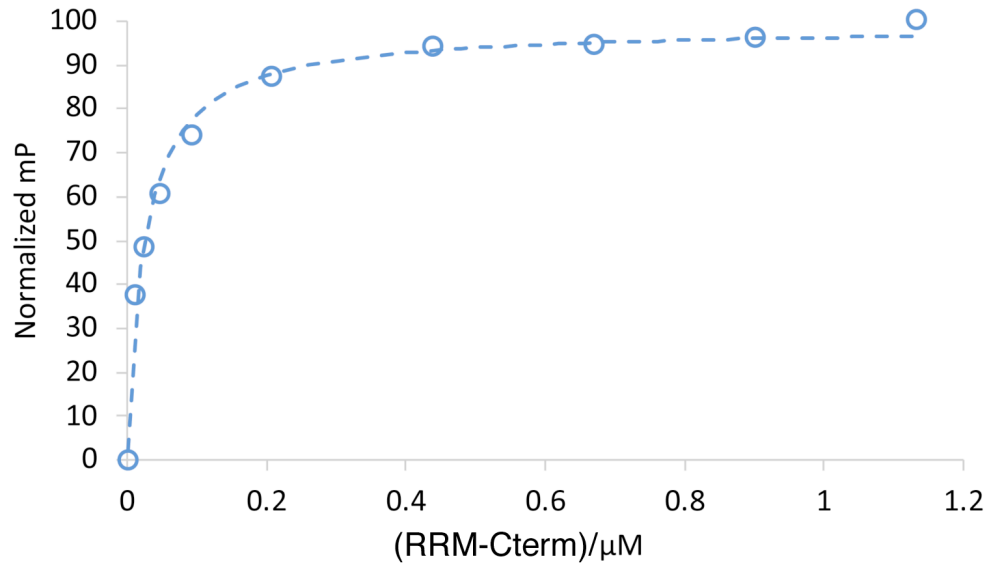

**Figure S6.** FP binding isotherm investigating binding to the RNA telomeric sequence by the TbRGG2 RRM-Cterm protein. The x-axis is the RRM-Cterm concentration in  $\mu\text{M}$  and the y-axis is normalized mP units.

Figure S7

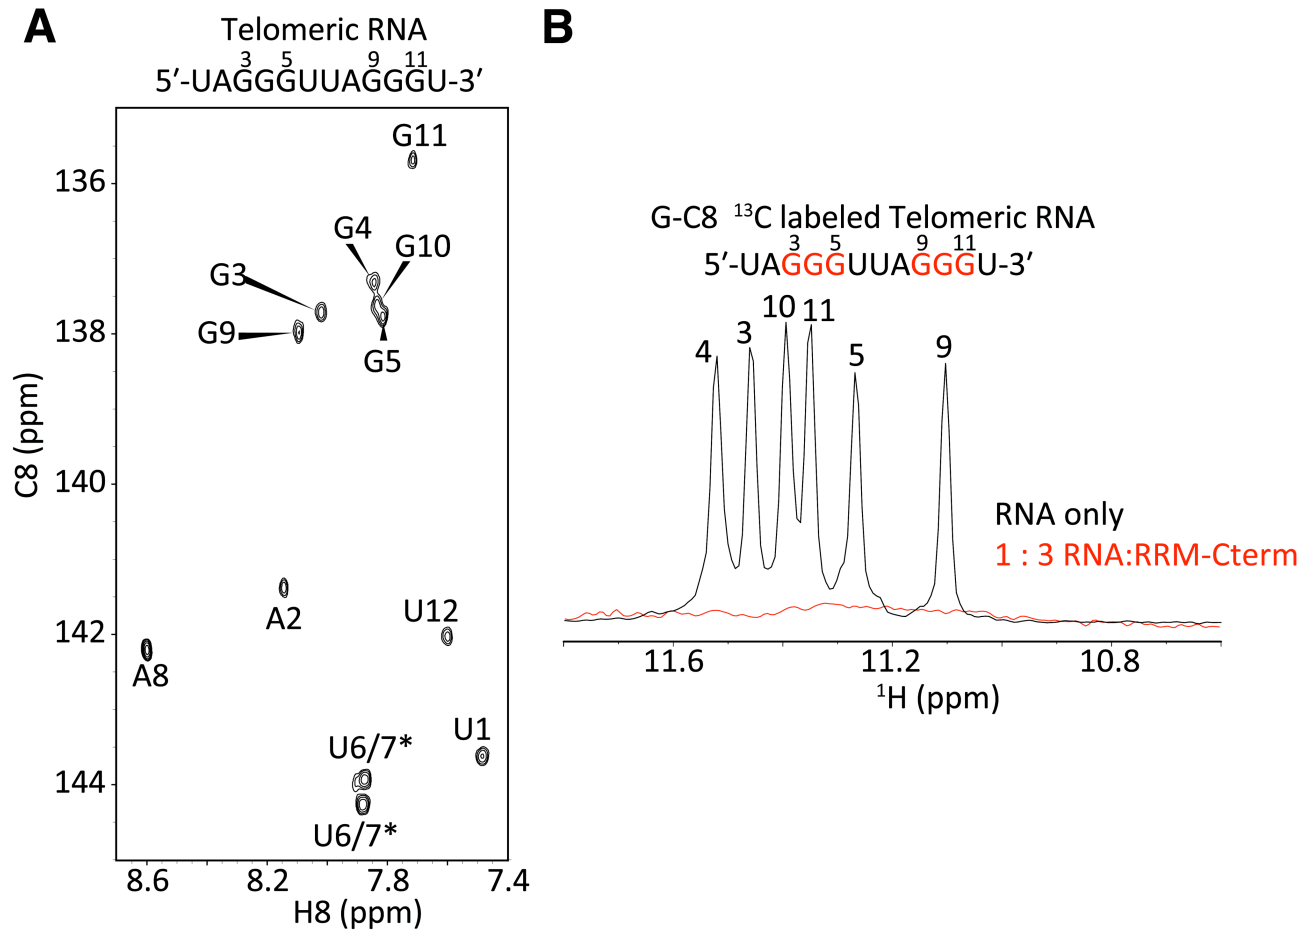

**Figure S7.** NMR spectra of telomeric RNA. **(A)** 2D aromatic spectra of telomeric RNA. **(B)** <sup>1</sup>H spectra of G-C8 <sup>13</sup>C labeled telomeric RNA in the absence (black) and presence (red) of RRM-Cterm protein.
